# Supplementary material for: Loss-of-function mutations in UDP-Glucose 6-Dehydrogenase cause recessive developmental epileptic encephalopathy
Source: PubMed Central journal article supplement (PMC6992768; doi:10.1038/s41467-020-14360-7), 2020-01-30
Supplement: 41467_2020_14360_MOESM1_ESM.pdf [file 41467_2020_14360_MOESM1_ESM.pdf]

**Loss-of-function Mutations in *UDP-Glucose 6-Dehydrogenase*  
Cause Recessive Developmental Epileptic Encephalopathy**

**Supplementary Information**

H. Hengel & C. Bosso-Lefèvre *et al.*, 2020

a

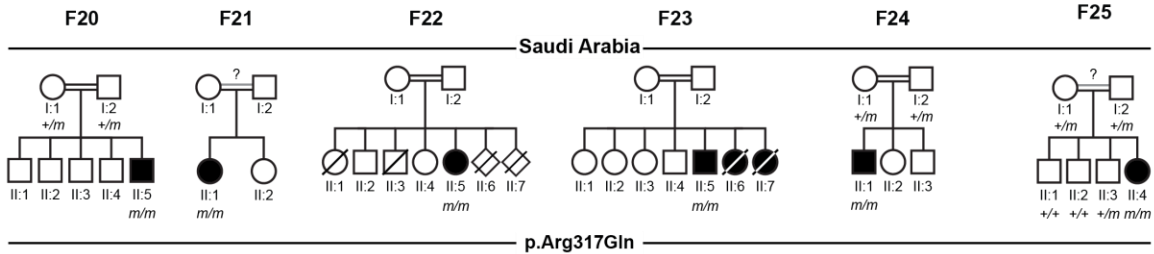

b

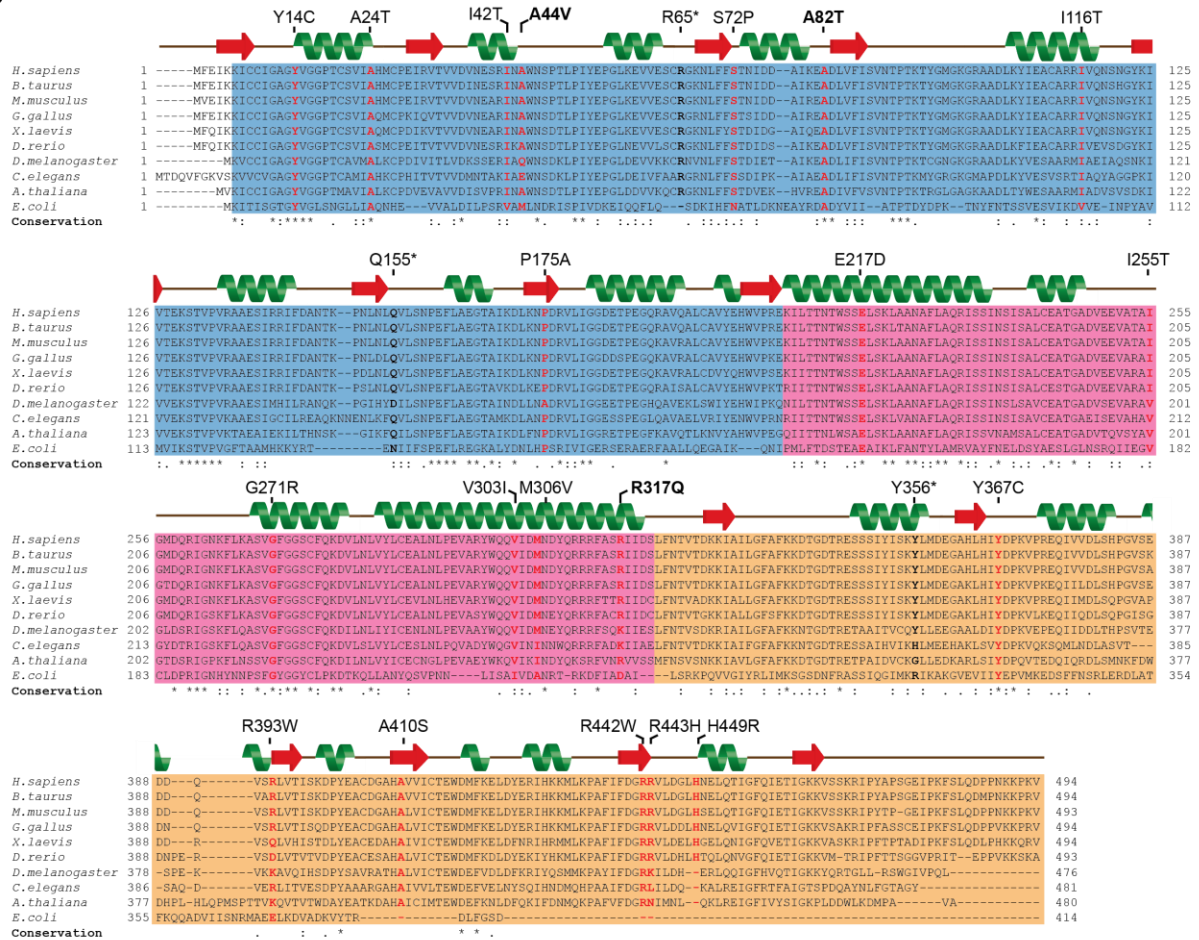

Supplementary Figure 1

**Supplementary Figure 1: UGDH mutations affect highly conserved residues.** (a) Pedigrees of families F20 to F25 from Saudi Arabia segregating autosomal recessive developmental epileptic encephalopathy. Filled black symbols, affected individuals. Crossed symbols, deceased individual. Mutations in UGDH protein are presented below pedigrees. Homozygous mutations are presented in bold (*m* in the pedigrees). Healthy siblings that could be sequenced are either homozygous WT (F25-II:1 and II:2) or heterozygous (F25-II:3) for the p.Arg317Gln mutation. (b) UGDH proteins alignment (using the CLUSTAL OMEGA software<sup>1,2</sup>) shows the conservation of the 22 affected amino acids found in 26 patients. The conservation of the mutated residues is shown in red (missense) and black (nonsense). Mutations found in a homozygous state are shown in bold. NAD-binding (blue), UDP-binding (orange) and central (pink) domains are highlighted. The secondary structure of UGDH is presented above the alignment as  $\beta$ -sheets (red arrows) and  $\alpha$ -helices (green spirals).

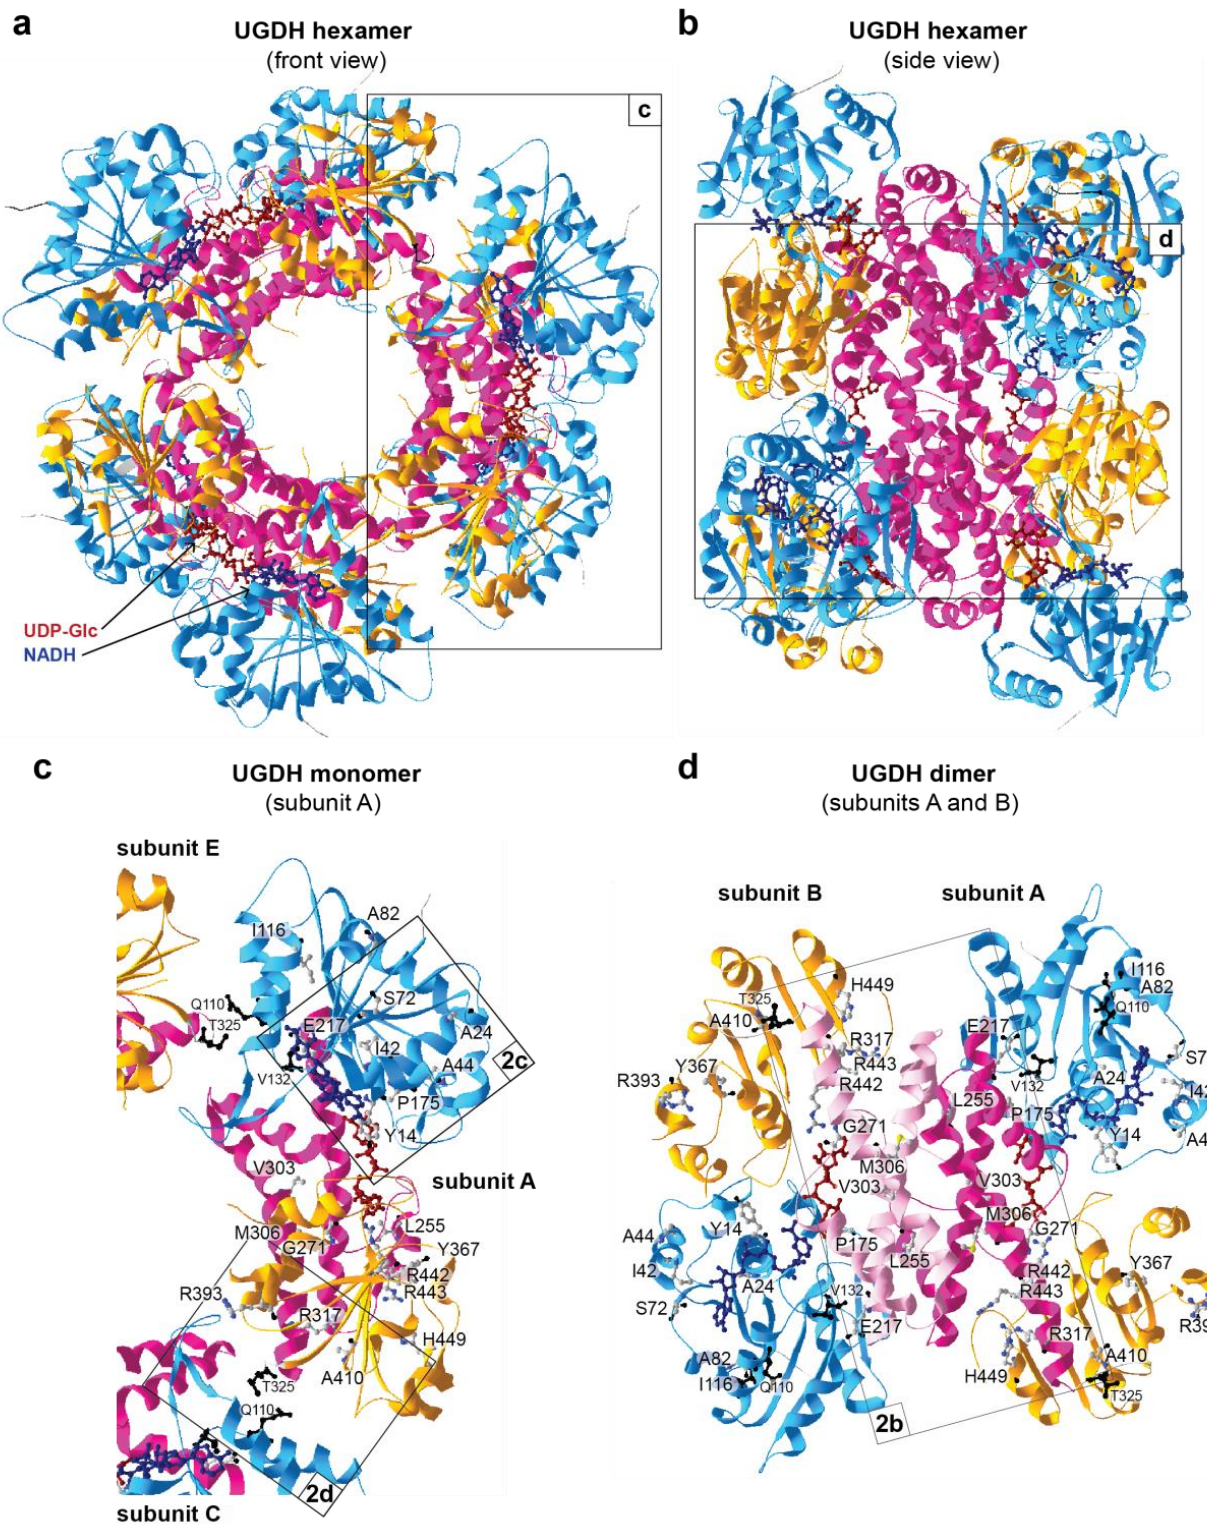

**Supplementary Figure 2**

**Supplementary Figure 2: Mutations in UGDH enzyme possibly alter its oligomerization.** Front (a) and side (b) views of the ribbon diagram of the UGDH hexamer bound to UDP-Glc and NADH. (c-d) Two close-up views of the ribbon diagrams of the UGDH protein bound to UDP-Glc and NADH as a monomer (d, subunit A; subunits C and E are shown at their interface with subunit A) and a dimer (e, subunits A and B). Residues carrying missense mutations in the patients are highlighted as 3D backbone. Residues Q110 and T325 known to interact together for dimer formation<sup>3</sup>; and residue V132 (important for hexamerization<sup>3</sup>) are highlighted in black backbone. Inserts 2b, 2c and 2d correspond to the close-up views shown in Figure 2b, c and d, respectively. In all the structures, NAD-binding (blue), central (light/dark pink), and UDP-binding (orange) domains are shown. UDP-Glc (dark red) and NADH (midnight blue) are represented as colored carbon backbones. Adapted from PDB code 2Q3E<sup>4</sup> using the Swiss-Pdb Viewer software<sup>5</sup>.



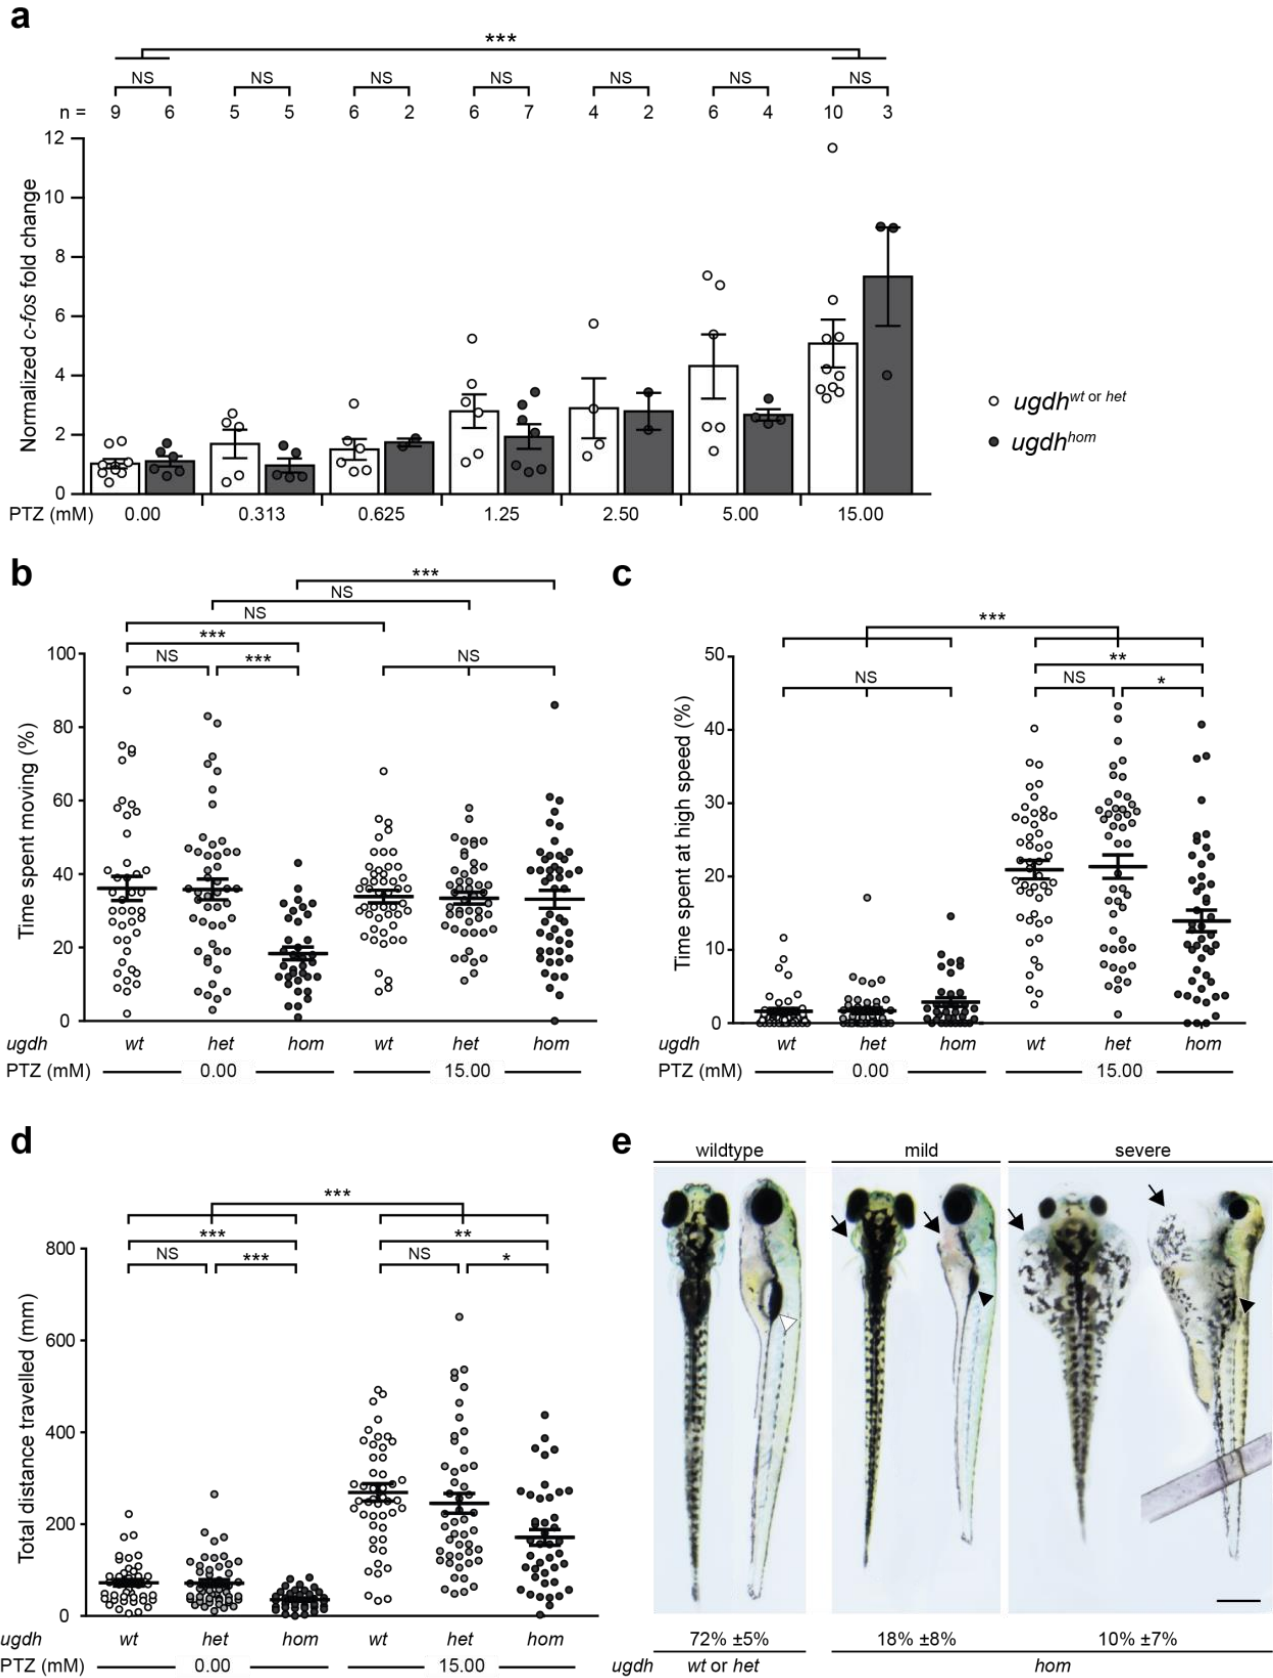

**Supplementary Figure 3**

**Supplementary Figure 3: Mutant *ugdh*<sup>i331D/i331D</sup> zebrafish larvae are not more susceptible to seizures.** (a) qPCR analysis for endogenous *c-fos* expression in the heads of 7-dpf (days post fertilisation) old larvae incubated with increasing PTZ concentration (from 0 to 15 mM as indicated below the x axis). *n* biological replicates of 20 heads each is indicated above the graph. (b-d) Locomotion assay in 7-dpf old larvae without (*n*= 42 wt, *n*= 48 heterozygous, and *n*= 36 homozygous larvae) or with PTZ 15 mM (*n*= 48, *n*= 48, and *n*= 42, respectively). Plotted are (b) the percentage of time that larvae spent moving, (c) the percentage of time spent at high speed, and (d) their total distance travelled in a user-defined area during a total recorded time of 6 minutes. (a-d) Data are mean ±s.e.m. NS, not significant, \**P*<0.05, \*\**P*<0.01, \*\*\**P*<0.001, one-way ANOVA with Bonferroni's correction. (e) Dorsal and lateral views of control and homozygous larvae at 7-dpf showing wild type, mild (slight pericardial edema, non-inflated swim bladder), and severe (extensive pericardial edema, non-inflated swim bladder) phenotypes. The proportion of each observed phenotype from *ugdh*<sup>wt/i331d</sup> incrosses is indicated below the pictures as percentage. Data are mean ±s.e.m from *n* = 10 incrosses with a total of 1877 larvae. Pericardial edema (black arrow), inflated swim bladder (white arrow head), and non-inflated swim bladder (black arrow heads) are indicated. Scale bar: 100 μm (a-e) Abbreviations: wt: *ugdh*<sup>wt/wt</sup> wild type larvae, het: *ugdh*<sup>wt/i331d</sup> heterozygous larvae and hom: *ugdh*<sup>i331d/i331d</sup> homozygous larvae. For graphs source data, please refer to the source data file 2.

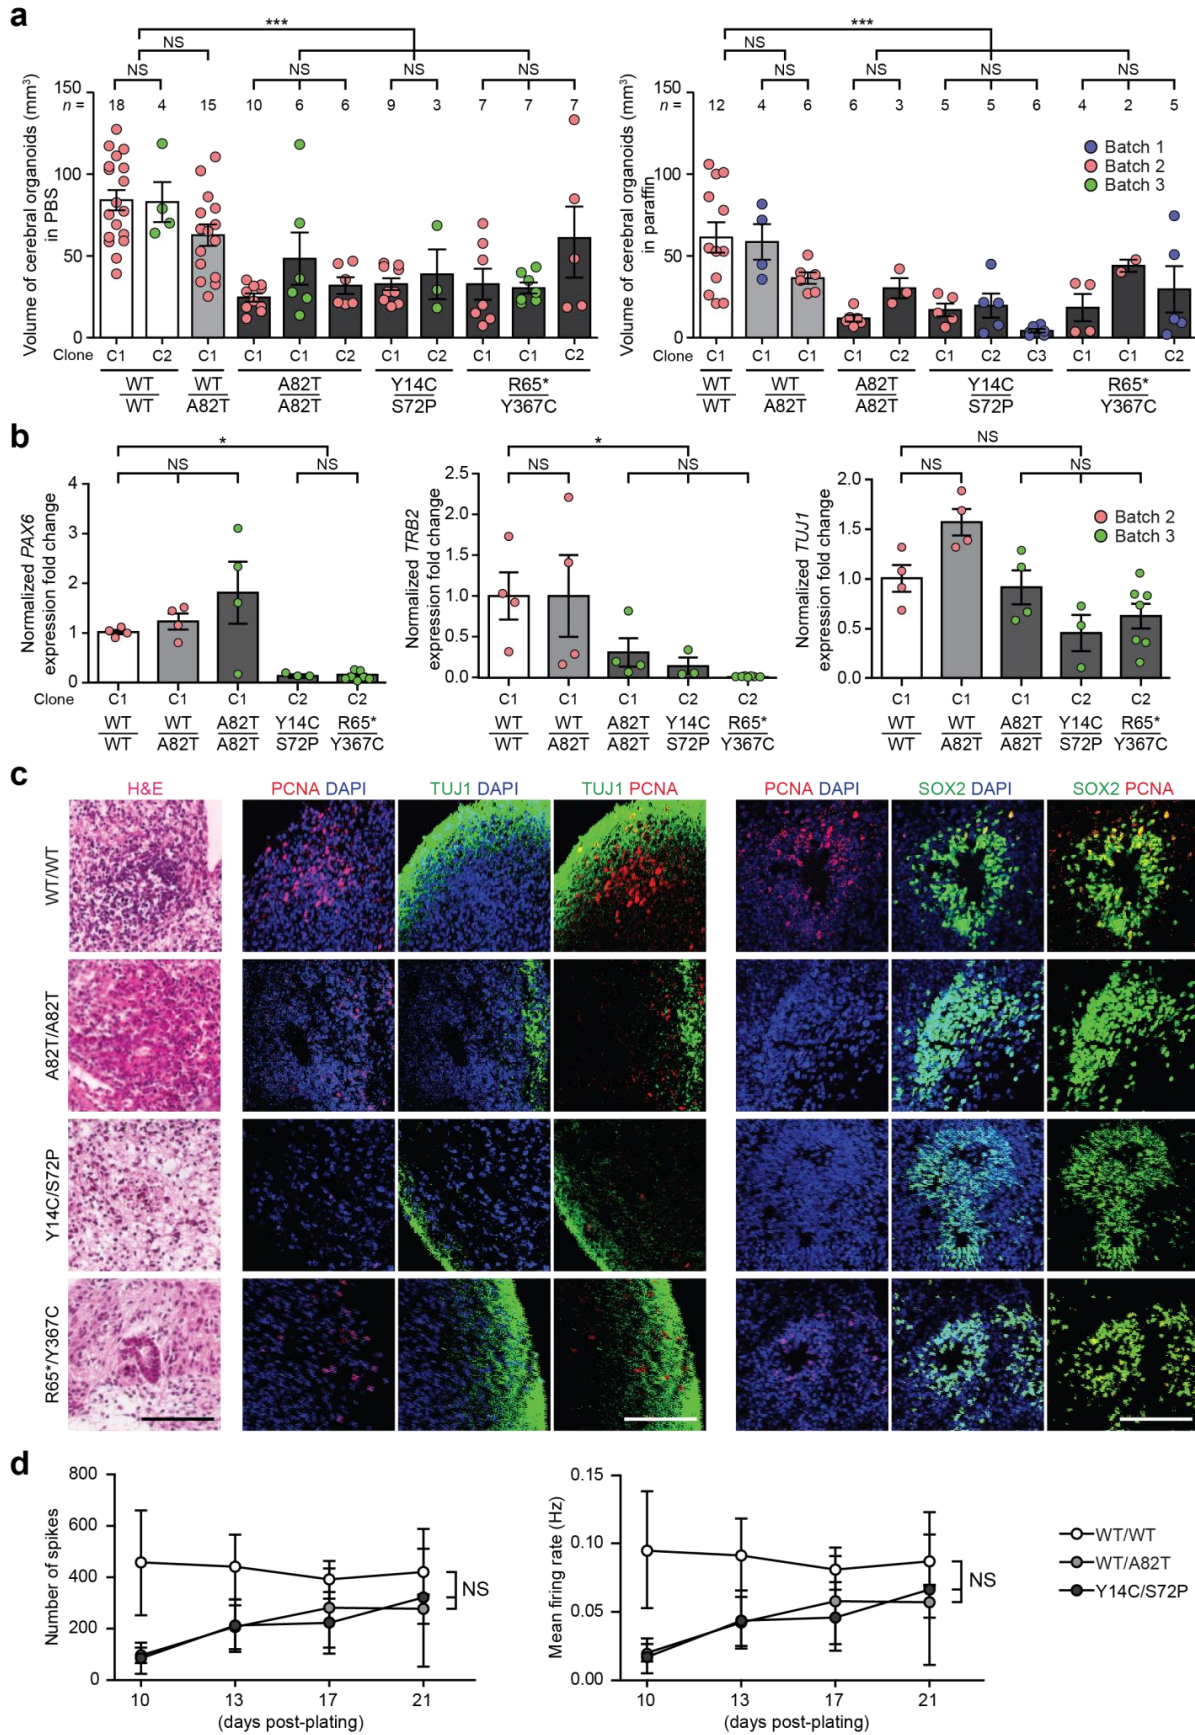

**Supplementary Figure 4**

H. Hengel & C. Bosso-Lefèvre *et al.*, 2020  
Supplementary information



**Supplementary Figure 4: Patient-derived cerebral organoids are underdeveloped while isolated neurons have normal activity (relative to Fig. 4).** (a) Volumes of cerebral organoids derived from iPSCs from WT, unaffected parent (*UGDH* WT/A82T), and patients (*UGDH* A82T/A82T, Y14C/S72P, and R65\*/Y367C) after 10 weeks of differentiation from 3 independent batches (as indicated). Volumes of cerebral organoids in PBS (left panel, batches 2 and 3) and in paraffin (right panel, batches 1 and 2) are shown. The iPSCs clone number used to derive the cerebral organoids (c), and the number of cerebral organoids analyzed (*n*) are indicated. Mean  $\pm$  SD is plotted. The data presenting in **Fig. 4a** are also included. (b) RT-qPCR analysis for neuronal differentiation markers (*PAX6*, *TBR2* and *TUJ1*) in cerebral organoids derived from iPSCs from WT (*n*= 4 cerebral organoids), unaffected parent (WT/A82T, *n*= 4), and patients (A82T/A82T (*n*= 4), Y14C/S72P (*n*= 3), and R65\*/Y367C (*n*= 7). Data are mean  $\pm$  SD fold change relative to WT, and normalized to *GAPDH*. The iPSCs clone numbers used to derive the cerebral organoids (c), and the 2 independent batches of cerebral organoids are indicated. The data from batch 2 are also reported in **Fig. 4c**. (c) Representative images of consecutive sections of cerebral organoids derived from clone 2 iPSCs from WT, and patients (A82T/A82T, Y14C/S72P, and R65\*/Y367C) stained with H&E, and immunostained with markers TUJ1/PCNA/DAPI, SOX2/PCNA/DAPI. Scale bar = 100  $\mu$ m. (d) Graphical representation of the number of neuron-evoked spikes and mean firing rate detected by multi-electrode arrays (*n*= 6 per line per time-point) of NPCs-derived neurons. Mean  $\pm$  SD is plotted. (a, b, d) Asterisks indicate p-values of  $p < 0.05$  (\*),  $p < 0.01$  (\*\*),  $p < 0.001$  (\*\*\*), NS: non-significant ( $p > 0.05$ ) as determined by ANOVA test with Bonferroni correction (a, c) or with Tukey's multiple correction (d). For graphs source data, please refer to the source data file 2.

| Chr. | Start     | End       | Ref | Alt | status | Variant                                               | ExAC     | SIFT [0;1] | Polyphen2 (HumDiv) [0;1] | CADD [10;60] | GERP++ [-12.3;6.17] | phyloP (100way) | Comment            |
|------|-----------|-----------|-----|-----|--------|-------------------------------------------------------|----------|------------|--------------------------|--------------|---------------------|-----------------|--------------------|
| 4    | 39523002  | 39523002  | G   | A   | hom    | UGDH : NM_003359 ;<br>exon2 : c.131C>T ; p.A44V       | 1.65E-05 | 0.01       | 0.871                    | 33           | 6.07                | 9.434           | segregates         |
| 1    | 230824270 | 230824270 | G   | T   | hom    | COG2 : NM_007357 ;<br>exon15 : c.1756G>T ; p.A586S    | .        | 0.07       | 1                        | 32           | 5.67                | 9.071           | does not segregate |
| 19   | 1036553   | 1036553   | G   | T   | hom    | CNN2 : NM_004368 ;<br>exon6 : c.646G>T ; p.A216S      | .        | 0.03       | 0.994                    | 19.7         | 4.04                | 9.34            | does not segregate |
| 22   | 30500401  | 30500401  | G   | A   | hom    | HORMAD2 : NM_001329457 ;<br>exon6 : c.269G>A ; p.C90Y | 9.95E-05 | 0.01       | 1                        | 18.35        | 5.19                | 3.859           | does not segregate |
| 1    | 229600595 | 229600595 | G   | A   | hom    | NUP133 : NM_018230 ;<br>exon18 : c.2327C>T ; p.T776M  | 3.30E-05 | 0.12       | 0.96                     | 17.32        | 5.27                | 5.412           | does not segregate |
| 1    | 231396281 | 231396281 | A   | G   | hom    | GNPAT : NM_014236 ;<br>exon3 : c.290A>G ; p.D97G      | .        | 0.08       | 0.653                    | 17.15        | 4.83                | 7.192           | does not segregate |
| 1    | 215793416 | 215793416 | A   | G   | hom    | KCTD3 : NM_016121 ;<br>exon18 : c.1904A>G ; p.H635R   | 8.62E-06 | 0.46       | 0                        | 12.3         | 5.77                | 3.253           | does not segregate |

**Supplementary Table 1: Variant list after filtering for homozygous or compound heterozygous variants in exomes from patient F1-II:3 and F1-II:6.** Annotations were obtained using ANNOVAR<sup>6</sup>. CADD scores are PHRED-scaled. Abbreviations: Chr.: chromosome; ".": variant not found in ExAC<sup>7</sup>; Ref: reference; Alt: alternative; ND: not determined; hom: homozygous.

| Family              | Chr. | Start    | End      | Ref | Alt | Variant           | EVS6500  | ExAC     | gnomAD   | SIFT | Polyphen2 (HumDiv) | CADD  | GERP++ | phyloP (100way) | $\Delta\Delta G$ (Kcal/mol) |
|---------------------|------|----------|----------|-----|-----|-------------------|----------|----------|----------|------|--------------------|-------|--------|-----------------|-----------------------------|
| F7                  | 4    | 39505523 | 39505523 | T   | C   | c.1346A>G;p.H449R | .        | .        | .        | 0.78 | 0.006              | 15.11 | 5.62   | 7.961           | -1.05                       |
| F12, F14, F15       | 4    | 39505541 | 39505541 | C   | T   | c.1328G>A;p.R443H | .        | .        | .        | 0.03 | 0.999              | 35    | 5.62   | 7.741           | -1.28                       |
| F15                 | 4    | 39505545 | 39505545 | G   | A   | c.1324C>T;p.R442W | .        | .        | 4.06E-06 | 0    | 1                  | 23.7  | 4.78   | 4.839           | -0.856                      |
| F3                  | 4    | 39506072 | 39506072 | C   | A   | c.1228G>T;p.A410S | .        | 1.66E-05 | 8.12E-06 | 0    | 0.999              | 28.2  | 4.78   | 7.411           | -2.4                        |
| F3                  | 4    | 39506123 | 39506123 | G   | A   | c.1177C>T;p.R393W | .        | 8.94E-06 | 1.63E-05 | 0    | 0.993              | 20.5  | 4.75   | 3.811           | -0.5                        |
| F6                  | 4    | 39506928 | 39506928 | T   | C   | c.1100A>G;p.Y367C | .        | .        | .        | 0    | 1                  | 23.2  | 6.03   | 7.425           | -1.8                        |
| F8                  | 4    | 39506960 | 39506960 | A   | C   | c.1068T>G;p.Y356* | .        | .        | .        | 0.15 | n/a                | 36    | -0.679 | 0.404           | n/a                         |
| <b>F16-F25</b>      | 4    | 39507325 | 39507325 | C   | T   | c.950G>A;p.R317Q  | .        | 5.77E-05 | 4.89E-05 | 0.02 | 0.982              | 20.9  | 4.87   | 4.688           | -1.23                       |
| F2                  | 4    | 39507359 | 39507359 | T   | C   | c.916A>G;p.M306V  | .        | .        | .        | 0.64 | 0.193              | 15.01 | 5.07   | 7.698           | -1.13                       |
| F12                 | 4    | 39507368 | 39507368 | C   | T   | c.907G>A;p.V303I  | .        | .        | .        | 0.02 | 0.961              | 23.1  | 4.98   | 7.487           | -1.07                       |
| F10                 | 4    | 39511380 | 39511380 | C   | G   | c.811G>C;p.G271R  | .        | .        | .        | 0    | 1                  | 29.9  | 5.51   | 7.167           | -0.42                       |
| F10                 | 4    | 39511427 | 39511427 | A   | G   | c.764T>C;p.I255T  | .        | .        | 8.15E-06 | 0    | 0.999              | 23.4  | 5.51   | 8.569           | -3.21                       |
| F11                 | 4    | 39511985 | 39511985 | C   | G   | c.651G>C;p.E217D  | .        | .        | .        | 0    | 1                  | 18.34 | 1.39   | 0.564           | -2.31                       |
| F9                  | 4    | 39512113 | 39512113 | G   | C   | c.523C>G;p.P175A  | .        | .        | .        | 0.08 | 0.997              | 21.7  | 5.12   | 9.196           | -1.64                       |
| F2, F7              | 4    | 39512283 | 39512283 | G   | A   | c.463C>T;p.Q155*  | .        | .        | 4.06E-06 | 0.14 | n/a                | 36    | 5.12   | 9.137           | n/a                         |
| F14                 | 4    | 39512399 | 39512399 | A   | G   | c.374T>C;p.I116T  | .        | .        | .        | 0    | 0.998              | 26.1  | 5.95   | 8.642           | -3.24                       |
| <b>F5</b>           | 4    | 39515723 | 39515723 | C   | T   | c.244G>A;p.A82T   | .        | .        | .        | 0.03 | 0.999              | 23.4  | 3.93   | 6.915           | -1.83                       |
| F4                  | 4    | 39515753 | 39515753 | A   | C   | c.214T>G;p.S72A   | .        | .        | .        | 0    | 0.949              | 28.8  | 5.66   | 8.263           | -0.35                       |
| F6, F13             | 4    | 39515774 | 39515774 | G   | A   | c.193C>T;p.R65*   | .        | 9.96E-05 | 7.43E-05 | 1    | n/a                | 24.6  | 1.78   | 2.743           | n/a                         |
| <b>F1, F11, F13</b> | 4    | 39523002 | 39523002 | G   | A   | c.131C>T;p.A44V   | .        | 1.65E-05 | 2.05E-05 | 0.01 | 0.871              | 33    | 6.07   | 9.434           | -0.27                       |
| F8                  | 4    | 39523008 | 39523008 | A   | G   | c.125T>C;p.I42T   | .        | .        | .        | 0    | 0.999              | 26.5  | 6.07   | 8.923           | -2.76                       |
| F9                  | 4    | 39523063 | 39523063 | C   | T   | c.70G>A;p.A24T    | .        | .        | .        | 0    | 1                  | 36    | 6.07   | 7.456           | -2.07                       |
| F4                  | 4    | 39523092 | 39523092 | T   | C   | c.41A>G;p.Y14C    | 7.70E-05 | 8.24E-06 | 4.10E-06 | 0    | 1                  | 26.8  | 6.07   | 7.665           | -0.18                       |

**Supplementary Table 2: Genetic characteristics of identified UGDH mutations and their predicted effect on the protein stability.** Families carrying homozygous mutations are depicted in bold. All cDNA positions refer to transcript NM\_003359. Annotations were obtained using ANNOVAR<sup>6</sup>. CADD scores are PHRED-scaled.  $\Delta\Delta G$  is the predicted stability change expressed as variation in Gibbs Free Energy (Kcal mol<sup>-1</sup>) with negative values denoting destabilizing mutations, as determined by DUET software<sup>8</sup>. Abbreviations: Chr: chromosome; “.”: variant not found in database; Ref: reference; Alt: alternative; n/a: not applicable.

| Chr. | Position | Ref   | Alt | Variant            | HMZ  | MAF in ExAC | SIFT | PolyPhen-2 (HumDiv) | CADD  | GERP++ | phyloP (100 way) | Comment                                                                                      |
|------|----------|-------|-----|--------------------|------|-------------|------|---------------------|-------|--------|------------------|----------------------------------------------------------------------------------------------|
| 4    | 39501722 | CAAA  | C   | c.*38_*40delTTT    | 2319 | 4.38E-01    | .    | .                   | .     | .      | .                | 3' UTR variant                                                                               |
| 4    | 39501722 | CAA   | C   | c.*39_*40delTT     | 111  | 1.27E-01    | .    | .                   | .     | .      | .                | 3' UTR variant                                                                               |
| 4    | 39501722 | CA    | C   | c.*40delT          | 37   | 9.19E-02    | .    | .                   | .     | .      | .                | 3' UTR variant                                                                               |
| 4    | 39501722 | CAAAA | C   | c.*37_*40delTTTT   | 8    | 1.35E-01    | .    | .                   | .     | .      | .                | 3' UTR variant                                                                               |
| 4    | 39528752 | G     | A   | c.-8+151C>T        | 2907 | 7.30E-01    | .    | .                   | .     | .      | .                | intronic variant                                                                             |
| 4    | 39511359 | T     | C   | c.811+21A>G        | 2685 | 1.73E-01    | .    | .                   | .     | .      | .                | intronic variant                                                                             |
| 4    | 39510175 | G     | A   | c.906+11C>T        | 2659 | 1.72E-01    | .    | .                   | .     | .      | .                | intronic variant                                                                             |
| 4    | 39515655 | T     | C   | c.264+48A>G        | 2391 | 1.67E-01    | .    | .                   | .     | .      | .                | intronic variant                                                                             |
| 4    | 39510329 | C     | T   | c.812-49G>A        | 1350 | 1.43E-01    | .    | .                   | .     | .      | .                | intronic variant                                                                             |
| 4    | 39506144 | C     | T   | c.1172-16G>A       | 1047 | 1.06E-01    | .    | .                   | .     | .      | .                | intronic variant                                                                             |
| 4    | 39515853 | T     | C   | c.163-49A>G        | 51   | 2.33E-02    | .    | .                   | .     | .      | .                | intronic variant                                                                             |
| 4    | 39506997 | G     | GA  | c.1038-8dupT       | 4    | 8.69E-03    | .    | .                   | .     | .      | .                | intronic variant                                                                             |
| 4    | 39505456 | C     | G   | c.1374+39G>C       | 1    | 2.01E-05    | .    | .                   | .     | .      | .                | intronic variant                                                                             |
| 4    | 39505643 | C     | T   | c.1264-38G>A       | 1    | 2.97E-04    | .    | .                   | .     | .      | .                | intronic variant                                                                             |
| 4    | 39507206 | A     | C   | c.1037+32T>G       | 1    | 4.40E-04    | .    | .                   | .     | .      | .                | intronic variant                                                                             |
| 4    | 39506052 | C     | G   | c.1248G>C;p.E416D  | 1    | 1.21E-03    | 0.05 | 0.511               | 13.66 | 1.48   | 0.594            | Missense variant. Prediction scores and MAF are not suggestive for a disease causing variant |
| 4    | 39506938 | G     | C   | c.1090C>G;p.L364V  | 1    | 2.23E-04    | 0.63 | 0.062               | 14.31 | 6.03   | 7.293            | Missense variant. Prediction scores and MAF are not suggestive for a disease causing variant |
| 4    | 39506997 | GA    | G   | c.1038-8delT       | 2624 | 2.20E-01    | .    | .                   | .     | .      | .                | Variant in splice region. No effect on the splicing product is predicted by HSF              |
| 4    | 39511530 | T     | TA  | c.664-4dupT        | 1022 | 3.19E-01    | .    | .                   | .     | .      | .                | Variant in splice region. No effect on the splicing product is predicted by HSF              |
| 4    | 39510283 | G     | A   | c.812-3C>T         | 6    | 2.97E-03    | .    | .                   | .     | .      | .                | Variant in splice region. No effect on the splicing product is predicted by HSF              |
| 4    | 39511530 | TA    | T   | c.664-4delT        | 2    | 4.90E-02    | .    | .                   | .     | .      | .                | Variant in splice region. No effect on the splicing product is predicted by HSF              |
| 4    | 39511530 | T     | TAA | c.664-5_664-4dupTT | 1    | 7.86E-03    | .    | .                   | .     | .      | .                | Variant in splice region. No effect on the splicing product is predicted by HSF              |
| 4    | 39510264 | A     | G   | c.828T>C;p.c276c   | 2689 | 1.72E-01    | .    | .                   | .     | .      | .                | synonymous variant                                                                           |
| 4    | 39515736 | A     | G   | c.231T>C;p.D77D    | 2548 | 1.69E-01    | .    | .                   | .     | .      | .                | synonymous variant                                                                           |
| 4    | 39512347 | T     | C   | c.399A>G;p.P133P   | 963  | 1.15E-01    | .    | .                   | .     | .      | .                | synonymous variant                                                                           |
| 4    | 39522995 | A     | G   | c.138T>C;p.N46N    | 6    | 2.99E-03    | .    | .                   | .     | .      | .                | synonymous variant                                                                           |
| 4    | 39523001 | C     | A   | c.132G>T;p.A44A    | 1    | 5.69E-04    | .    | .                   | .     | .      | .                | synonymous variant                                                                           |

**Supplementary Table 3: Homozygous UGDH variants in ExAC:** A total of 27 homozygous variants were recorded in ExAC. Twenty of these variants are synonymous, intronic or in the UTR regions. Five variants are within splice site regions but do not affect the splicing products according to the Human Splicing Finder<sup>9</sup>. Only two homozygous missense variants were found, each of them in one single case. Both have low pathogenicity prediction scores than the patients' mutations reported here. No homozygous truncating mutations were present in ExAC.



| Species   | Gene           | Forward Primer 5' - 3'     | Reverse Primer 5' - 3'   | purpose    |
|-----------|----------------|----------------------------|--------------------------|------------|
| Human     | <i>UGDH</i>    | CTTGCCAGAGAATAAGCAG        | CAAATTCAGAACATCCTTTTGGGA | qPCR       |
| Human     | <i>β-ACTIN</i> | ATGTTTGAGACCTTCACACC       | AGGTAGTCAGTCAGGTCCCGGCC  | qPCR       |
| Human     | <i>GAPDH</i>   | TGAACCACCAACTGCTTAGC       | GGCATGGACTGTGGTCATGAG    | qPCR       |
| Human     | <i>PAX6</i>    | CCGTGTGCCTCAACCGTA         | CACGGTTTACTGGGTCTGG      | qPCR       |
| Human     | <i>TBR2</i>    | AAATGGGTGACCTGTGGCAAAGC    | CTCCTGTCTCATCCAGTGGGAA   | qPCR       |
| Human     | <i>TUJ1</i>    | TCAGCGTCTACTACAACGAGGC     | GCCTGAAGAGATGTCCAAAGGC   | qPCR       |
| zebrafish | PCR1           | GTATGTGCAGGTGATTGACA       | TGTAGGTCACAGGTTTTTGGACA  | genotyping |
| zebrafish | PCR2           | GACATGAATGAATATCAGAGAAAGAG | AGGAGAAACCCAACAACGC      | genotyping |
| zebrafish | <i>c-fos</i>   | AACTGTCACGGCGATCTCTT       | GCAGGCATGTATGGTTCAGA     | qPCR       |
| zebrafish | <i>gapdh</i>   | GTGGAGTCTACTGGTGTCTT       | GTGCAGGAGGCATTGCTTAC     | qPCR       |

**Supplementary Table 4: List of primers**

| Protein      | Organism | Dilution factor | Reference                               |
|--------------|----------|-----------------|-----------------------------------------|
| <b>UGDH</b>  | rabbit   | 500             | Sigma-Aldrich, USA, HPA036657           |
| <b>GAPDH</b> | mouse    | 2000            | Santa Cruz Biotechnology Inc., SC 47724 |
| <b>SOX2</b>  | mouse    | 200             | R&D systems, MAB2018                    |
| <b>TUJ1</b>  | mouse    | 3000            | Biolegend MMS-435P                      |
| <b>GFAP</b>  | rabbit   | 2500            | Dako Z0334                              |
| <b>PCNA</b>  | rabbit   | 1µg/ml          | abcam ab18197                           |

**Supplementary Table 5: List of antibodies**

## Supplementary Note 1

### Prevalence estimation of affected UGDH patients based on gnomAD<sup>7</sup>.

In a simplified model, the assumption was made that UGDH mutations are spread equally in general population reflecting the worldwide distribution of families in our series. The model ignores the fact that several mutations were found in families with consanguineous background (F1, F5, F16-F25) and therefore likely underestimates the number of affected patients. Based on the 19 detected mutations and the gnomAD<sup>7</sup> spanning 123,136 exomes the allele frequency of identified mutations was assessed. Allele frequencies were available for eight mutations, the other eleven mutations were not represented in gnomAD<sup>7</sup> and are therefore underrepresented in this estimation. Allele frequencies of these eight mutations added up to  $1.84 \times 10^{-4}$  (**Suppl. Table 2**). Further, we assumed that all Loss-of-Function (LoF) variants are pathogenic but hypothesized that biallelic LoF variants are not viable. In gnomAD<sup>7</sup>, additional 15 LoF variants were found with a total allele frequency of  $8.32 \times 10^{-5}$  (**Suppl. Table 6**). Additional potentially pathogenic variants were identified by filtering missense variants from gnomAD<sup>7</sup> with the following strict filter criteria:

- I) minor allele frequency (MAF) below  $1 \times 10^{-4}$  (rendering the range of already detected pathogenic variants)
- II) affecting a residue with similar or higher conservation scores than in the detected mutations (phyloP100way>4)
- III) consistently pathogenic predictions by SIFT<sup>10</sup>, PolyPhen-2 HDIV<sup>11</sup>, LRT<sup>12</sup> and MutationTaster<sup>13</sup>.

These strict filter criteria resulted in 50 additional potentially pathogenic missense variants with an allele frequency of  $4.06 \times 10^{-4}$  (**Suppl. Table 7**). Based on these results, the allele frequency of UGDH mutations in global population is calculated to be around  $6.73 \times 10^{-4}$ , which would lead to a prevalence of 1:2,210,000 (**Suppl. Table 8**). However, without confirming the potentially pathogenic missense variants identified in gnomAD<sup>7</sup> and just taking into account LoF variants and mutations established in this paper, the allele frequency may be as low as  $2.68 \times 10^{-4}$  (prevalence of 1:14,000,000).

| Chr.          | Start    | End      | Ref   | Alt   | Variant                              | MAF in GnomAD   |
|---------------|----------|----------|-------|-------|--------------------------------------|-----------------|
| 4             | 39501837 | 39501841 | TTCTC | -     | exon12 : c.1407_1411del ; p.K469fs   | 4.09E-06        |
| 4             | 39506054 | 39506054 | C     | A     | exon10 : c.1246G>T ; p.E416*         | 4.06E-06        |
| 4             | 39506871 | 39506871 | G     | T     | exon9 : c.1157C>A ; p.S386*          | 8.68E-06        |
| 4             | 39506971 | 39506971 | -     | A     | exon9 : c.1056dupT ; p.I353fs        | 4.48E-06        |
| 4             | 39507261 | 39507261 | G     | -     | exon8 : c.1014delC ; p.F338fs        | 4.11E-06        |
| 4             | 39510254 | 39510254 | C     | -     | exon7 : c.838delG ; p.D280fs         | 4.29E-06        |
| 4             | 39511477 | 39511477 | A     | -     | exon6 : c.714delT ; p.S238fs         | 4.08E-06        |
| 4             | 39511989 | 39511989 | G     | T     | exon5 : c.647C>A ; p.S216*           | 4.06E-06        |
| 4             | 39512105 | 39512108 | TCTG  | -     | exon5 : c.528_531del ; p.D176fs      | 4.06E-06        |
| 4             | 39512140 | 39512140 | C     | A     | exon5 : c.496G>T ; p.G166*           | 4.06E-06        |
| 4             | 39512316 | 39512316 | -     | TCTCT | exon4 : c.429_430insAGAGA ; p.F144fs | 4.06E-06        |
| 4             | 39512427 | 39512427 | T     | A     | exon4 : c.319A>T ; p.K107*           | 2.44E-05        |
| 4             | 39515800 | 39515800 | C     | -     | exon3 : c.167delG ; p.G56fs          | 4.73E-06        |
| 4             | 39523091 | 39523092 | AT    | -     | exon2 : c.41_42del ; p.Y14fs         | 4.08E-06        |
| <b>Total=</b> |          |          |       |       |                                      | <b>8.32E-05</b> |

**Supplementary Table 6: Frequency of additional LoF Variants from gnomAD.** Abbreviations: Chr = chromosome, Ref = reference, Alt = alternative; n/a: not applicable. All cDNA positions refer to transcript NM\_003359. Annotations were obtained using ANNOVAR<sup>6</sup>.

| Chr | Start    | End      | Ref | Alt | Variant                      | MAF in GnomAD | SIFT | PolyPhen-2 HDIV | LRT | Mutation Taster | phyloP 100way [-20;10] |
|-----|----------|----------|-----|-----|------------------------------|---------------|------|-----------------|-----|-----------------|------------------------|
| 4   | 39512065 | 39512065 | C   | A   | exon5 : c.571G>T ; p.A191S   | 5.28E-05      | D    | D               | D   | D               | 7.266                  |
| 4   | 39515773 | 39515773 | C   | T   | exon3 : c.194G>A ; p.R65Q    | 3.72E-05      | D    | D               | D   | D               | 6.915                  |
| 4   | 39501809 | 39501809 | G   | A   | exon12 : c.1439C>T ; p.P480L | 2.85E-05      | D    | D               | D   | D               | 8.27                   |
| 4   | 39512160 | 39512160 | T   | C   | exon5 : c.476A>G ; p.N159S   | 2.03E-05      | D    | D               | D   | D               | 7.424                  |
| 4   | 39501852 | 39501852 | C   | T   | exon12 : c.1396G>A ; p.V466M | 1.67E-05      | D    | P               | D   | D               | 4.082                  |
| 4   | 39505590 | 39505590 | G   | A   | exon11 : c.1279C>T ; p.R427C | 1.22E-05      | D    | D               | D   | D               | 4.851                  |
| 4   | 39512097 | 39512097 | A   | G   | exon5 : c.539T>C ; p.I180T   | 1.22E-05      | D    | D               | D   | D               | 8.697                  |
| 4   | 39515753 | 39515753 | A   | G   | exon3 : c.214T>C ; p.S72P    | 9.80E-06      | D    | D               | D   | D               | 8.263                  |
| 4   | 39515786 | 39515786 | C   | T   | exon3 : c.181G>A ; p.V61I    | 9.34E-06      | D    | P               | D   | D               | 6.915                  |
| 4   | 39515720 | 39515720 | C   | T   | exon3 : c.247G>A ; p.D83N    | 8.89E-06      | D    | P               | D   | D               | 6.915                  |
| 4   | 39506944 | 39506944 | C   | T   | exon9 : c.1084G>A ; p.A362T  | 8.63E-06      | D    | D               | D   | D               | 5.507                  |
| 4   | 39522985 | 39522985 | G   | C   | exon2 : c.148C>G ; p.L50V    | 8.25E-06      | D    | P               | D   | D               | 9.434                  |
| 4   | 39511427 | 39511427 | A   | G   | exon6 : c.764T>C ; p.I255T   | 8.15E-06      | D    | D               | D   | D               | 8.569                  |
| 4   | 39506117 | 39506117 | C   | T   | exon10 : c.1183G>A ; p.V395M | 8.14E-06      | D    | D               | D   | D               | 7.411                  |
| 4   | 39505551 | 39505551 | C   | T   | exon11 : c.1318G>A ; p.D440N | 8.12E-06      | D    | D               | D   | D               | 7.741                  |
| 4   | 39506072 | 39506072 | C   | A   | exon10 : c.1228G>T ; p.A410S | 8.12E-06      | D    | D               | D   | D               | 7.411                  |
| 4   | 39512092 | 39512092 | C   | T   | exon5 : c.544G>A ; p.G182R   | 8.12E-06      | D    | D               | D   | D               | 7.266                  |
| 4   | 39512348 | 39512348 | G   | A   | exon4 : c.398C>T ; p.P133L   | 8.12E-06      | D    | D               | D   | D               | 9.137                  |
| 4   | 39515749 | 39515749 | G   | C   | exon3 : c.218C>G ; p.T73S    | 4.69E-06      | D    | P               | D   | D               | 6.941                  |
| 4   | 39515720 | 39515720 | C   | G   | exon3 : c.247G>C ; p.D83H    | 4.44E-06      | D    | D               | D   | D               | 6.915                  |
| 4   | 39511385 | 39511385 | C   | T   | exon6 : c.806G>A ; p.S269N   | 4.33E-06      | D    | D               | D   | D               | 7.167                  |
| 4   | 39523114 | 39523114 | T   | A   | exon2 : c.19A>T ; p.I7F      | 4.26E-06      | D    | D               | D   | D               | 5.924                  |
| 4   | 39523114 | 39523114 | T   | G   | exon2 : c.19A>C ; p.I7L      | 4.26E-06      | D    | P               | D   | D               | 5.924                  |
| 4   | 39501776 | 39501776 | T   | C   | exon12 : c.1472A>G ; p.K491R | 4.17E-06      | D    | P               | D   | D               | 6.941                  |
| 4   | 39506919 | 39506919 | T   | G   | exon9 : c.1109A>C ; p.K370T  | 4.16E-06      | D    | D               | D   | D               | 7.425                  |
| 4   | 39507272 | 39507272 | C   | T   | exon8 : c.1003G>A ; p.G335R  | 4.11E-06      | D    | D               | D   | D               | 7.487                  |
| 4   | 39501786 | 39501786 | G   | A   | exon12 : c.1462C>T ; p.P488S | 4.10E-06      | D    | D               | D   | D               | 8.525                  |
| 4   | 39511473 | 39511473 | G   | T   | exon6 : c.718C>A ; p.L240M   | 4.08E-06      | D    | D               | D   | D               | 4.278                  |



|         |          |          |   |   |                              |                 |   |   |   |   |       |
|---------|----------|----------|---|---|------------------------------|-----------------|---|---|---|---|-------|
| 4       | 39523074 | 39523074 | C | T | exon2 : c.59G>A ; p.C20Y     | 4.08E-06        | D | D | D | D | 7.456 |
| 4       | 39511437 | 39511437 | C | T | exon6 : c.754G>A ; p.A252T   | 4.07E-06        | D | D | D | D | 7.167 |
| 4       | 39501810 | 39501810 | G | A | exon12 : c.1438C>T ; p.P480S | 4.07E-06        | D | P | D | D | 8.27  |
| 4       | 39512468 | 39512468 | G | C | exon4 : c.278C>G ; p.T93R    | 4.07E-06        | D | D | D | D | 9.137 |
| 4       | 39512477 | 39512477 | T | C | exon4 : c.269A>G ; p.N90S    | 4.07E-06        | D | D | D | D | 7.424 |
| 4       | 39512477 | 39512477 | T | G | exon4 : c.269A>C ; p.N90T    | 4.07E-06        | D | D | D | D | 7.424 |
| 4       | 39505545 | 39505545 | G | A | exon11 : c.1324C>T ; p.R442W | 4.06E-06        | D | D | D | D | 4.839 |
| 4       | 39505566 | 39505566 | G | C | exon11 : c.1303C>G ; p.P435A | 4.06E-06        | D | D | D | D | 9.768 |
| 4       | 39512004 | 39512004 | G | T | exon5 : c.632C>A ; p.T211N   | 4.06E-06        | D | D | D | D | 9.196 |
| 4       | 39512014 | 39512014 | T | A | exon5 : c.622A>T ; p.I208F   | 4.06E-06        | D | D | D | D | 7.47  |
| 4       | 39512158 | 39512158 | G | A | exon5 : c.478C>T ; p.P160S   | 4.06E-06        | D | D | D | D | 9.137 |
| 4       | 39512414 | 39512414 | G | A | exon4 : c.332C>T ; p.A111V   | 4.06E-06        | D | P | D | D | 9.137 |
| 4       | 39512052 | 39512052 | A | G | exon5 : c.584T>C ; p.L195P   | 4.06E-06        | D | D | D | D | 8.697 |
| 4       | 39512109 | 39512109 | T | C | exon5 : c.527A>G ; p.D176G   | 4.06E-06        | D | D | D | D | 7.47  |
| 4       | 39512113 | 39512113 | G | T | exon5 : c.523C>A ; p.P175T   | 4.06E-06        | D | D | D | D | 9.196 |
| 4       | 39512136 | 39512136 | G | A | exon5 : c.500C>T ; p.T167I   | 4.06E-06        | D | D | D | D | 9.137 |
| 4       | 39512145 | 39512145 | G | T | exon5 : c.491C>A ; p.A164E   | 4.06E-06        | D | D | D | D | 9.137 |
| 4       | 39512345 | 39512345 | A | C | exon4 : c.401T>G ; p.V134G   | 4.06E-06        | D | D | D | D | 8.642 |
| 4       | 39512345 | 39512345 | A | G | exon4 : c.401T>C ; p.V134A   | 4.06E-06        | D | P | D | D | 8.642 |
| 4       | 39512351 | 39512351 | A | C | exon4 : c.395T>G ; p.V132G   | 4.06E-06        | D | D | D | D | 8.642 |
| 4       | 39512367 | 39512367 | T | G | exon4 : c.379A>C ; p.T127P   | 4.06E-06        | D | P | D | D | 5.693 |
| 4       | 39512376 | 39512376 | T | C | exon4 : c.370A>G ; p.K124E   | 4.06E-06        | D | D | D | D | 7.424 |
| Total = |          |          |   |   |                              | <b>4.06E-04</b> |   |   |   |   |       |

**Supplementary Table 7: Additional potentially pathogenic missense variants from gnomAD.** Abbreviations: Chr = chromosome, Ref = reference, Alt = alternative; n/a: not applicable; D = damaging (SIFT) / probably damaging (Polyphen2) / deleterious (LRT) / disease causing (Mutation Taster); P = possibly damaging. All cDNA positions refer to transcript NM\_003359. Annotations were obtained using ANNOVAR<sup>6</sup>.

|                                                        | total MAF in gnomAD | estimated prevalence | 1 patient per |
|--------------------------------------------------------|---------------------|----------------------|---------------|
| identified mutations                                   | 1.84E-04            |                      |               |
| additional LoF                                         | 8.32E-05            |                      |               |
| additional potentially pathogenic missense variants    | 4.06E-04            |                      |               |
| total                                                  | 6.73E-04            | 4.53E-07             | 2.21E+06      |
| total without potentially pathogenic missense variants | 2.68E-04            | 7.16E-08             | 1.40E+07      |

**Supplementary Table 8: Prevalence estimation based on gnomAD.** Abbreviation: MAF: minor allele frequency.

## Supplementary References

1. Goujon, M. *et al.* A new bioinformatics analysis tools framework at EMBL-EBI. *Nucleic Acids Res.* **38**, 695–699 (2010).
2. Sievers, F. *et al.* Fast, scalable generation of high-quality protein multiple sequence alignments using Clustal Omega. *Mol. Syst. Biol.* **7**, 539–539 (2014).
3. Sommer, B. J., Barycki, J. J. & Simpson, M. A. Characterization of human UDP-glucose dehydrogenase: CYS-276 is required for the second of two successive oxidations. *J. Biol. Chem.* **279**, 23590–23596 (2004).
4. Egger, S., Chaikuad, A., Kavanagh, K. L., Oppermann, U. & Nidetzky, B. Structure and mechanism of human UDP-glucose 6-dehydrogenase. *J. Biol. Chem.* **286**, 23877–23887 (2011).
5. Guex, N. & Peitsch, M. C. SWISS-MODEL and the Swiss-PdbViewer: An environment for comparative protein modeling. *Electrophoresis* **18**, 2714–2723 (1997).
6. Wang, K., Li, M. & Hakonarson, H. ANNOVAR: Functional annotation of genetic variants from high-throughput sequencing data. *Nucleic Acids Res.* **38**, 1–7 (2010).
7. Lek, M. *et al.* Analysis of protein-coding genetic variation in 60,706 humans. *Nature* **536**, 285–291 (2016).
8. Pires, D. E. V., Ascher, D. B. & Blundell, T. L. DUET: A server for predicting effects of mutations on protein stability using an integrated computational approach. *Nucleic Acids Res.* **42**, 314–319 (2014).
9. Desmet, F. O. *et al.* Human Splicing Finder: An online bioinformatics tool to predict splicing signals. *Nucleic Acids Res.* **37**, 1–14 (2009).
10. Kumar, P., Henikoff, S. & Ng, P. C. Predicting the effects of coding non-synonymous variants on protein function using the SIFT algorithm. *Nat. Protoc.* **4**, 1073–1081 (2009).
11. Adzhubei, I. A. *et al.* A method and server for predicting damaging missense mutations. *Nat. Methods* **7**, 248–249 (2010).
12. Chun, S. & Fay, J. C. Identification of deleterious mutations within three human genomes. *Identif. deleterious Mutat. within three Hum. genomes.* **19**, 1553–1561 (2009).
13. Schwarz, J. M., Rödelberger, C., Schuelke, M. & Seelow, D. MutationTaster evaluates disease-causing potential of sequence alterations. *Nat. Methods* **7**, 575–576 (2010).
